# Supplementary material for: Activation of lateral preoptic neurons is associated with nest-building in male mice
Source: PubMed Central journal article supplement (PMC11004109; doi:10.1038/s41598-024-59061-z), 2024-04-09
Supplement: 41598_2024_59061_MOESM1_ESM.pdf [file 41598_2024_59061_MOESM1_ESM.pdf]

## Supplementary Information

Activation of lateral preoptic neurons is associated with nest-building in male mice

Natsuki Tagawa<sup>1,2</sup>, Keita Mori<sup>2</sup>, Michinori Koebis<sup>3</sup>, Atsu Aiba<sup>2,3</sup>, Yuichi Iino<sup>2</sup>, Yousuke Tsuneoka<sup>1\*</sup>, Hiromasa Funato<sup>1,4\*</sup>

<sup>1</sup>Department of Anatomy, Graduate School of Medicine, Toho University, Tokyo 143-8540, Japan.

<sup>2</sup>Department of Biological Sciences, Graduate School of Science, The University of Tokyo, Bunkyo-ku, Tokyo, 113-0033, Japan. <sup>3</sup>Laboratory of Animal Resources, Center for Disease

Biology and Integrative Medicine, Graduate School of Medicine, The University of Tokyo, Tokyo 113-0033, Japan. <sup>4</sup>International Institute for Integrative Sleep Medicine (IIS), University of Tsukuba, Tsukuba, Japan

\* Correspondence:

Yousuke Tsuneoka, [yousuke.tsuneoka@med.toho-u.ac.jp](mailto:yousuke.tsuneoka@med.toho-u.ac.jp)

Hiromasa Funato, [hiromasa.funato@med.toho-u.ac.jp](mailto:hiromasa.funato@med.toho-u.ac.jp)

**Supplementary Table S1.** The proportion of *Vgat*-positive cells or *Vglut*-positive cells among c-Fos positive cells in each group of fathers.

|             |        | <b>NES</b> | <b>PUP</b> |
|-------------|--------|------------|------------|
| <b>MPOA</b> | Vgat   | 65.9%      | 70.7%      |
|             | Vglut2 | 26.9%      | 25.0%      |
| <b>LPOA</b> | Vgat   | 59.5%      | 61.7%      |
|             | Vglut2 | 35.4%      | 34.0%      |

**Supplementary Table S2.** Sequences of probe sets

The nucleotide sequences of probe sets that were used for in situ hybridization chain reaction to detect mRNA are shown.

| Probe name  | First probe                               | Second probe                                 |
|-------------|-------------------------------------------|----------------------------------------------|
| Vgat-1S41   | GCTCGACGTAACCACGACGTA<br>CAAGATACACGTCAT  | AACTGTTGTACATGAGGTTGCCG<br>CTAATCCTTTGCAACA  |
| Vgat-2S41   | GCTCGACGTAAGTGTGAGATTC<br>TTCAGGAAGGCGCAG | ACACAGCAGACTGAACTTGGAC<br>ACGAATCCTTTGCAACA  |
| Vgat-3S41   | GCTCGACGTAACACCTTCTCC<br>CAGGCCCAATCACGC  | AAACTTCTTGACGTCGATGTAGA<br>ACAATCCTTTGCAACA  |
| Vgat-4S41   | GCTCGACGTAAGTGTGATG<br>TTGCCTTCGAGAGAG    | GTTCATCATGCAGTGGAAATTCGC<br>TGAATCCTTTGCAACA |
| Vgat-5S41   | GCTCGACGTAAGAGAGACTTC<br>TCCAGCACTTCGACG  | GAAGAAGGCGCGACTGCCTTCC<br>TGGAATCCTTTGCAACA  |
| Vgat-6S41   | GCTCGACGTAATGGCCATGA<br>GCAGCGTGAAGACCA   | ATGAGCAGCGCGAAGTGTGGCA<br>CGTAATCCTTTGCAACA  |
| Vgat-7S41   | GCTCGACGTAATGCCACAGCA<br>GCTTGCGCCAGAGAA  | AAGATGGCCACATCGAAGAAGA<br>CCTAATCCTTTGCAACA  |
| Vgat-8S41   | GCTCGACGTAATGATGAGGAA<br>CAACCCAGGTAGCC   | TGTAGCAGCACACCACTGCGGC<br>GAAAATCCTTTGCAACA  |
| Vgat-9S41   | GCTCGACGTAATATGGCCACAT<br>ACGAGTCCCACG    | GAATCGAGGAGCGCAGCATGCG<br>TTAAATCCTTTGCAACA  |
| Vgat-10S41  | GCTCGACGTAACCTCGATGAG<br>ACCCTCGAGTGAATG  | CCTAGTCCTCTGCGTTGGTTCGG<br>TAAATCCTTTGCAACA  |
|             |                                           |                                              |
| Vglut2-1S45 | CCTCCACGTAACACACAGCTG<br>TGGTTTAGGCAGCGC  | TCTTTGCGAACGTGAGTGAATAA<br>CAAATCCATCTAAGCT  |
| Vglut2-2S45 | CCTCCACGTAATCTCCTCCCAT<br>CGCGCCGGCGTAAT  | TGCTGTTAGCTTCTGCCTTAAC<br>ATAATCCATCTAAGCT   |
| Vglut2-3S45 | CCTCCACGTAATGTTCTGGAA<br>GTCACCTCACCGAAA  | GTATTTGGGCGGGTGCTGATGAG<br>TCAATCCATCTAAGCT  |
| Vglut2-4S45 | CCTCCACGTAATAATAGGAG<br>AATTGGTACACACAG   | AATAGCTGCATGCAGCCCACGGG<br>TTAATCCATCTAAGCT  |
| Vglut2-5S45 | CCTCCACGTAATGGCTATGAA                     | TCCAGCCTTACCAGATTTAAATT                      |

|              |                                           |                                              |
|--------------|-------------------------------------------|----------------------------------------------|
|              | AGACGGATTCTGCGC                           | GTAATCCATCTAAGCT                             |
| Vglut2-6S45  | CCTCCACGTAACACCCTGTAG<br>ATCTGTCCGAGGGAT  | CTCTCGGTTGTCCTGCTTCTTCTC<br>CAATCCATCTAAGCT  |
| Vglut2-7S45  | CCTCCACGTAAGTAAGATTTG<br>GTGGTACCGTAATTT  | GCCTCCATTCTCCTGTGAGGTAG<br>CAAATCCATCTAAGCT  |
| Vglut2-8S45  | CCTCCACGTAAATGGGAATCT<br>CATGGTCTGTTTTGA  | CGTGACAACCTGCCACAGATTGC<br>ACTAATCCATCTAAGCT |
| Vglut2-9S45  | CCTCCACGTAAGTGCCAACTG<br>TTGTAGTTGTGCTCT  | GGCTTCCTAACTTCTGTAGGATG<br>ACAATCCATCTAAGCT  |
| Vglut2-10S45 | CCTCCACGTAAGTCTCTAGAC<br>AGGCTTTCCTGGGA   | ATCTAGCCATCTTTCCTGTTCCAC<br>TAATCCATCTAAGCT  |
| Vglut2-11S45 | CCTCCACGTAAACCCAAAACCT<br>GACAGGTAAACACAC | GAGCACAGGACACCAGACAGAT<br>CAAATCCATCTAAGCT   |
| Vglut2-12S45 | CCTCCACGTAATTCTTAAGGTC<br>AGGAGTGGTTTGCA  | AGACACAAAGCAGAGAGGGACT<br>TCAAATCCATCTAAGCT  |
| Vglut2-13S45 | CCTCCACGTAAAAATCCTTTGT<br>TTTACCGACTCCAT  | TCTTTATCCCCTCTTTCCTCCGGGG<br>CAATCCATCTAAGCT |
| Vglut2-14S45 | CCTCCACGTAACATATTGAGG<br>GTAGAGGTGAGCAGT  | ATGCACTCTGGCTGCAGATGGGA<br>TCAAATCCATCTAAGCT |
| Vglut2-15S45 | CCTCCACGTAAACATGTACCA<br>GACCATGCCAAAGCT  | GGCTTCATAAGACACCAGAAG<br>CAAATCCATCTAAGCT    |
| Vglut2-16S45 | CCTCCACGTAATGCTCTCCTCT<br>ATGTACCTACGTTC  | CACCTAGCAGATTTGCGCTCTCT<br>CCAATCCATCTAAGCT  |
| Vglut2-17S45 | CCTCCACGTAATGGCCACCCC<br>TCTAGTATGAGAGTA  | ATCCTACTGCAAGCACCAAGAA<br>GGAAATCCATCTAAGCT  |
| Vglut2-18S45 | CCTCCACGTAAATACTGCCATT<br>CTTACCGGGACTTA  | GTGGACGAGTGCAGCAATGAGG<br>AAGAATCCATCTAAGCT  |
|              |                                           |                                              |
| Esr1-1S86    | GCTGGTCGGAAAATCCGTTCC<br>GAGGCTGTTATGACC  | GGAGCCTTGTGTTTTCGGTTTTG<br>GTAATGGATTGAGTGT  |
| Esr1-2S86    | GCTGGTCGGAATCATGGTCAT<br>GGTAAGTGGCAGCCG  | CCATCCCAGGCTTTGGTGTGA<br>AGAATGGATTGAGTGT    |
| Esr1-3S86    | GCTGGTCGGAATTACTGCTGG<br>ACAGTCTCTCTCGGC  | GACTCCATGATCATGTTTCCTTTC<br>TAATGGATTGAGTGT  |
| Esr1-4S86    | GCTGGTCGGAAGGCACAGTAG<br>CGAGTCTCCTTGGCA  | GTAGCCAGAGGCATAGTCATTGC<br>ACAATGGATTGAGTGT  |

|            |                                          |                                             |
|------------|------------------------------------------|---------------------------------------------|
| Esr1-5S86  | GCTGGTCGGAATGCTTCAACA<br>TTCTCCCTCCTCGGC | CCTTCCAAGTCATCTCTCTGACG<br>CTAATGGATTGAGTGT |
| Esr1-6S86  | GCTGGTCGGAATCCTGAAGCA<br>CCCATTTCATTTCGG | TGGCCAAAGGTTGGCAGCCCTC<br>ATGAATGGATTGAGTGT |
| Esr1-7S86  | GCTGGTCGGAATAGTGTGCTT<br>AATCACAAGAGGGCT | TCAAGGACAAGGCAGGGCTATT<br>CTTAATGGATTGAGTGT |
| Esr1-8S86  | GCTGGTCGGAATTCACTGAAG<br>GGTCTAGAAGGATCA | GTTGGTCAATAAGCCCATCATTG<br>AGAATGGATTGAGTGT |
| Esr1-9S86  | GCTGGTCGGAATATGAACCAG<br>CTCCCTATCTGCTAG | CTGGCACTCTCTTTGCCAGTTG<br>ATAATGGATTGAGTGT  |
| Esr1-10S86 | GCTGGTCGGAATCATGGAGAT<br>TCAAGTCCCCAAAGC | CAGGCACACTCGAGAAGGTGGA<br>CCTAATGGATTGAGTGT |
| Esr1-11S86 | GCTGGTCGGAAGTTAGGAGCA<br>AACAGGAGCTTCCCC | TTTACCTTGATTCCGTGCCAGGA<br>GCAATGGATTGAGTGT |
| Esr1-12S86 | GCTGGTCGGAACCCTGCAGGT<br>TCATCATGCGGAACC | ATGGATTTGAGGCACACAAACTC<br>TTAATGGATTGAGTGT |
| Esr1-13S86 | GCTGGTCGGAACGTGTACT<br>CCGGAATTAAGCAA    | CAGAGACTTCAAGGTGCTGGAC<br>AGAAATGGATTGAGTGT |
| Esr1-14S86 | GCTGGTCGGAACACGGTGGAT<br>GTGGTCCTTCTCTTC | TCAAAGTGTCTGTGATCTTGTC<br>AGAATGGATTGAGTGT  |
| Esr1-15S86 | GCTGGTCGGAAGTGGTGGCCA<br>GCTGGGTCTGGCTGG | TGTAAGGAATGTGCTGAAGTGG<br>AGCAATGGATTGAGTGT |
| Esr1-16S86 | GCTGGTCGGAATGCTAGTCAT<br>ACATGACATGGGTAA | CCACAGTGTACGCAGGAGACAG<br>AATAATGGATTGAGTGT |
| Esr1-17S86 | GCTGGTCGGAAGAAAGCCACT<br>GGTGGTGGATGCATG | CAAGCAAATAAATGGCCACTCAT<br>ACAATGGATTGAGTGT |
| Esr1-18S86 | GCTGGTCGGAAGAAGACATG<br>CCACTAAGAAGTGG   | CTGGAATCCCTTTGCCTGTTCC<br>CAAATGGATTGAGTGT  |
| Esr1-19S86 | GCTGGTCGGAAGAAGTGCTTA<br>TCAGAGGTGAAATGT | GCTGAGGCTTCCTCTTGAGCCA<br>TTAATGGATTGAGTGT  |
| Esr1-20S86 | GCTGGTCGGAAGTCAAGCTGC<br>CTTTACTGCAAGCCC | AGAATGTCCAGTTTACCAGAACA<br>GGAATGGATTGAGTGT |

**Supplementary Table S3.** Hairpin sequences and conjugated fluorophores

The nucleotide sequence of the hairpin DNA used for in situ hybridization chain reaction to detect mRNA and the fluorophores bound to the hairpin DNA are shown.

| Hairpin ID |    | Sequence                                        | Fluorophore  |
|------------|----|-------------------------------------------------|--------------|
| S41        | H1 | TGTTGCAAAGGAACGTCGAGCTGTAATG<br>GTGCTCGACGTTCC  | ATTO550      |
|            | H2 | GCTCGACGTTTCCTTTGCAACAGGAACGT<br>CGAGCACCATTACA |              |
| S45        | H1 | AGCTTAGATGGAACGTGGAGGTAACAAG<br>CACCTCCACGTTCC  | SaraFluor488 |
|            | H2 | CCTCCACGTTCCATCTAAGCTGGAACGTG<br>GAGGTGCTTGTTA  |              |
| S86        | H1 | ACACTCAATCCACCGACCAGCACAAGTC<br>ATGCTGGTCGGTGG  | SaraFluor488 |
|            | H2 | GCTGGTCGGTGGATTGAGTGTCCACCGA<br>CCAGCATGACTTGT  |              |

**Supplementary Figure S1.** Individual nest height scales were evaluated at that point every hour. A block indicates individual nest height at that hour. Each row indicates data from a mouse.

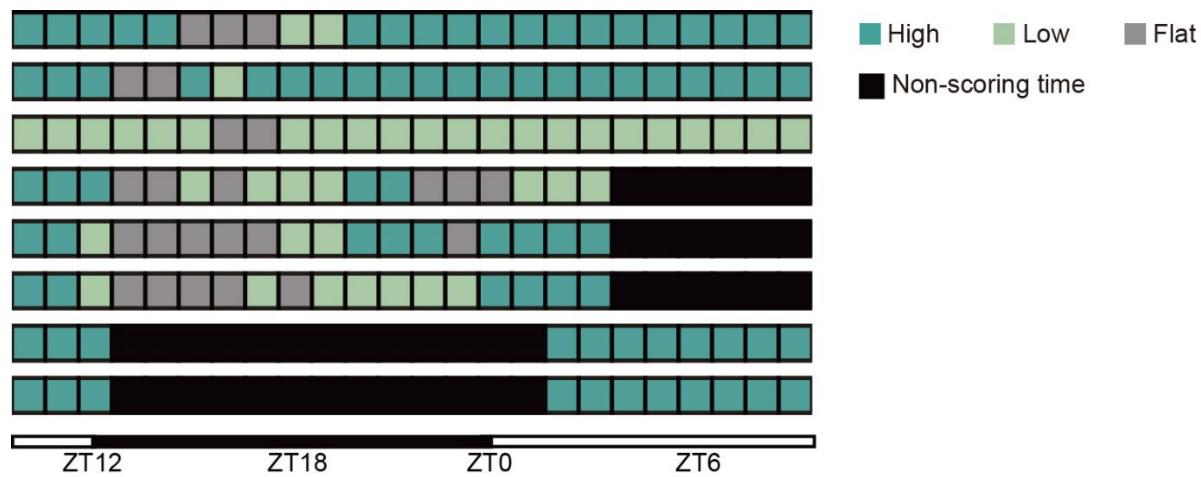

**Supplementary Figure S2.** The comparison of the behavioral pattern 30 minutes before and after nest-building behavior.

(a) Event plots for 30 minutes before and after continuous nest-building behavior. One plot indicates a behavior categorized per minute. A blue plot indicates “nest-building,” an orange plot indicates “active,” a gray plot indicates “inactive” and a black plot indicates “invisible”. (b-c) The comparison of inactive time 30 minutes before and after inactive time for 30 min prior to nest-building behavior in the dark phase (b) and the light phase (c). Paired t-test.

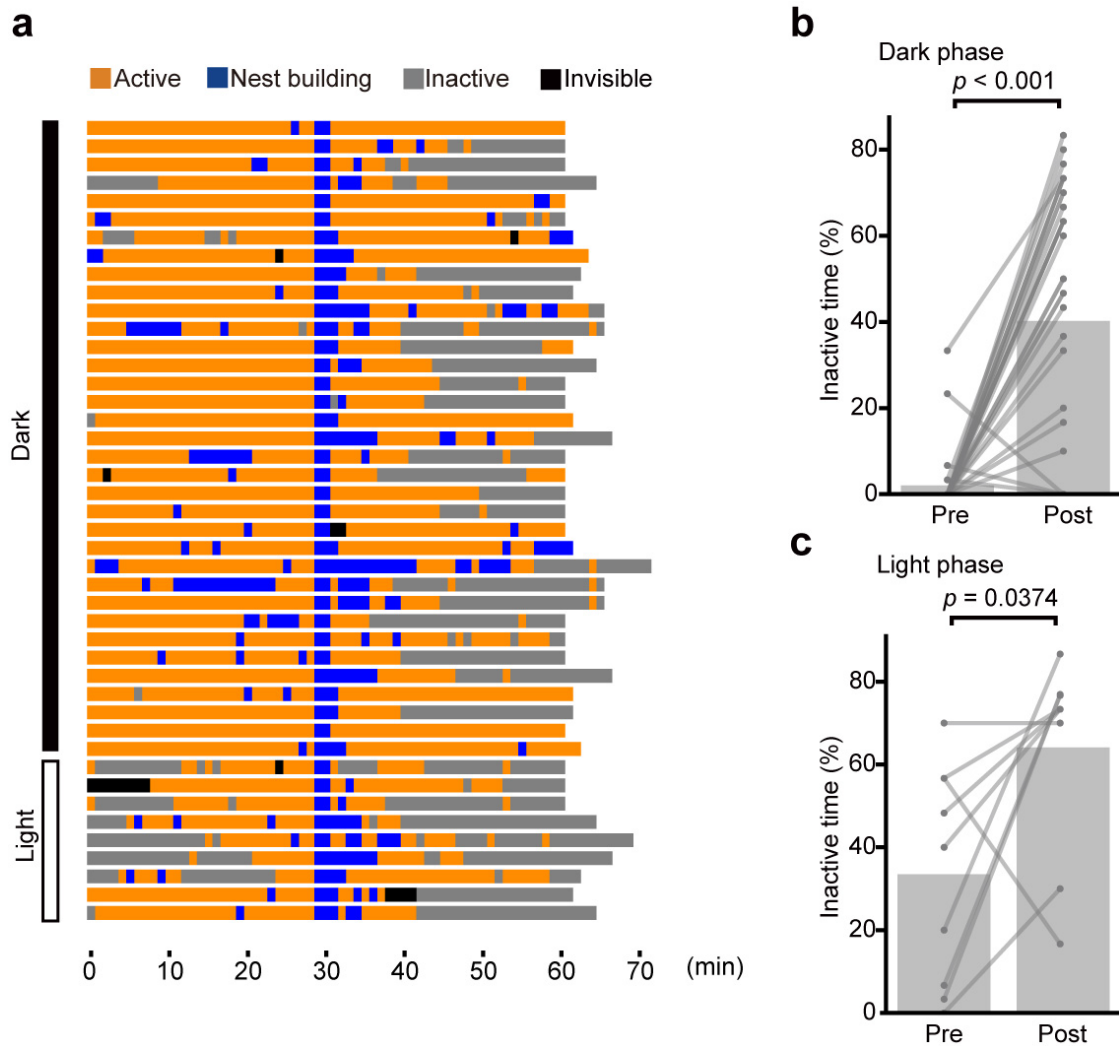



**Supplementary Figure S3.** Event plots for 90 minutes following the introduction of fresh nest material.

Each row indicates data from a mouse.

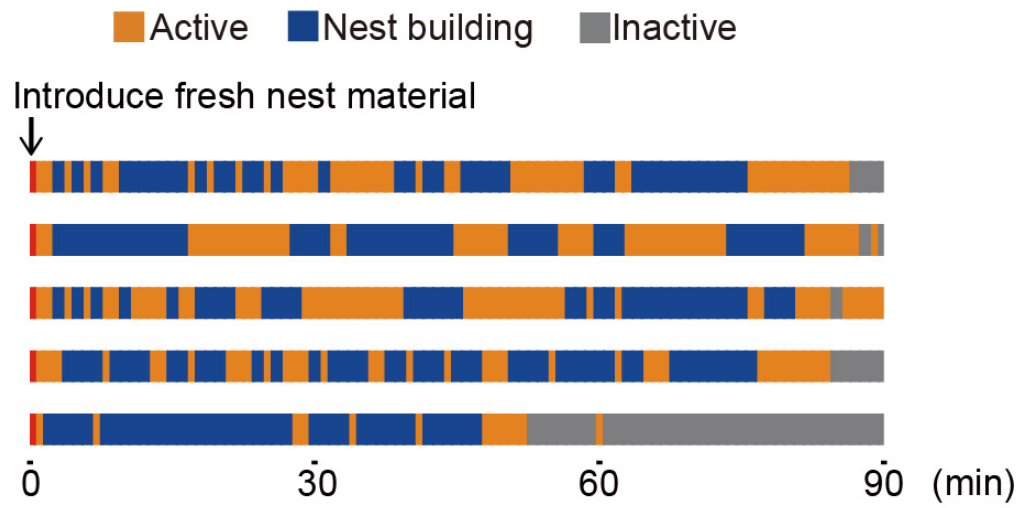

**Supplementary Figure S4.** No correlation of the age of the mice in nest-building group and the number of c-Fos positive cells in the POA in Figure. 3

(a-d) The correlation of the age of the mice in nest-building group and the number of c-Fos and Vgat positive cells in the MPOA (a), the number of c-Fos and Vgat positive cells in the LPOA (b), the number of c-Fos and Vglut2 positive cells in the MPOA (c), and the number of c-Fos and Vglut2 positive cells in the LPOA (d). Two-sided Spearman correlation coefficient.

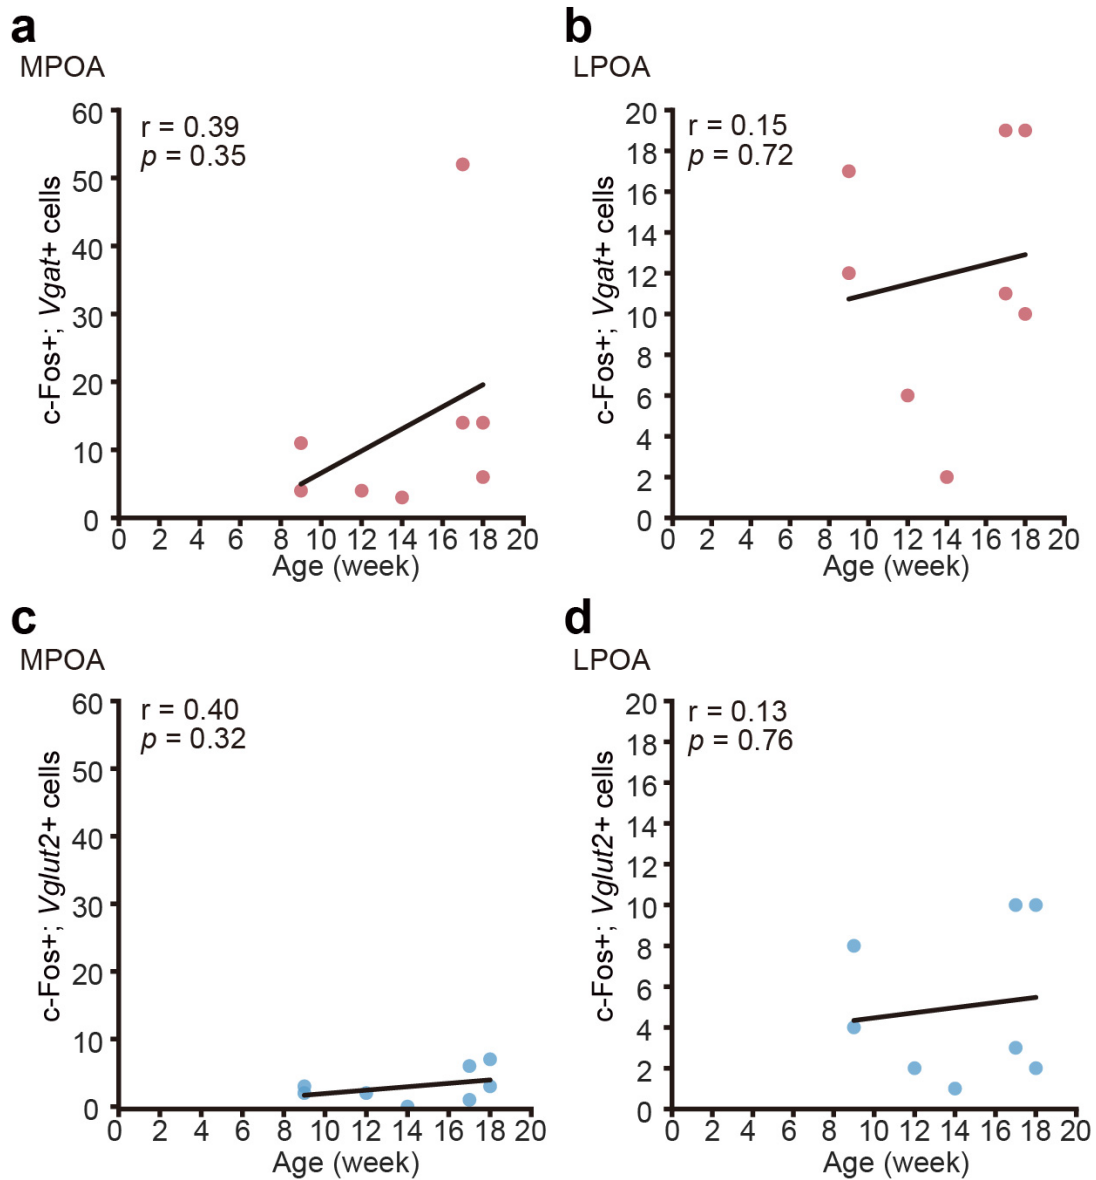

**Supplemental video. Nesting-related behaviors.**

When mice build nests, mice exhibit a variety of behavioral elements such as gathering, reshaping, pushing nest material, and burrowing into the nest. Related to Figure1.
